# Supplementary material for: Management to Support Multiple Ecosystem Services from Productive Grasslands
Source: MDPI journal article supplement (doi:10.3390/su13116263), 2021-06-01

**Figure S1** Layout of the four treatment levels for one of the replicate blocks. Treatments are in a hierarchical split-split-split plot design, defined by seed mix (whole plot: ‘Grass’, ‘Grass & legume’ and ‘Grass, legume & forb’), management (split plot: ‘grazing’ vs ‘cut’), management intensity (split-split plot: ‘Intensive’ vs. ‘Extensive’) and cultivation (‘Minimum tillage’ vs ‘Deep Plough’). Within each hierarchical level of the design allocation of treatment was at random. Physical fencing only occurred around the intensive grazing, extensive grazing, and cut plots combined, with splits between subsequent treatment levels not defined by physical fencing barriers. For more detail see the methodology section of the main paper.

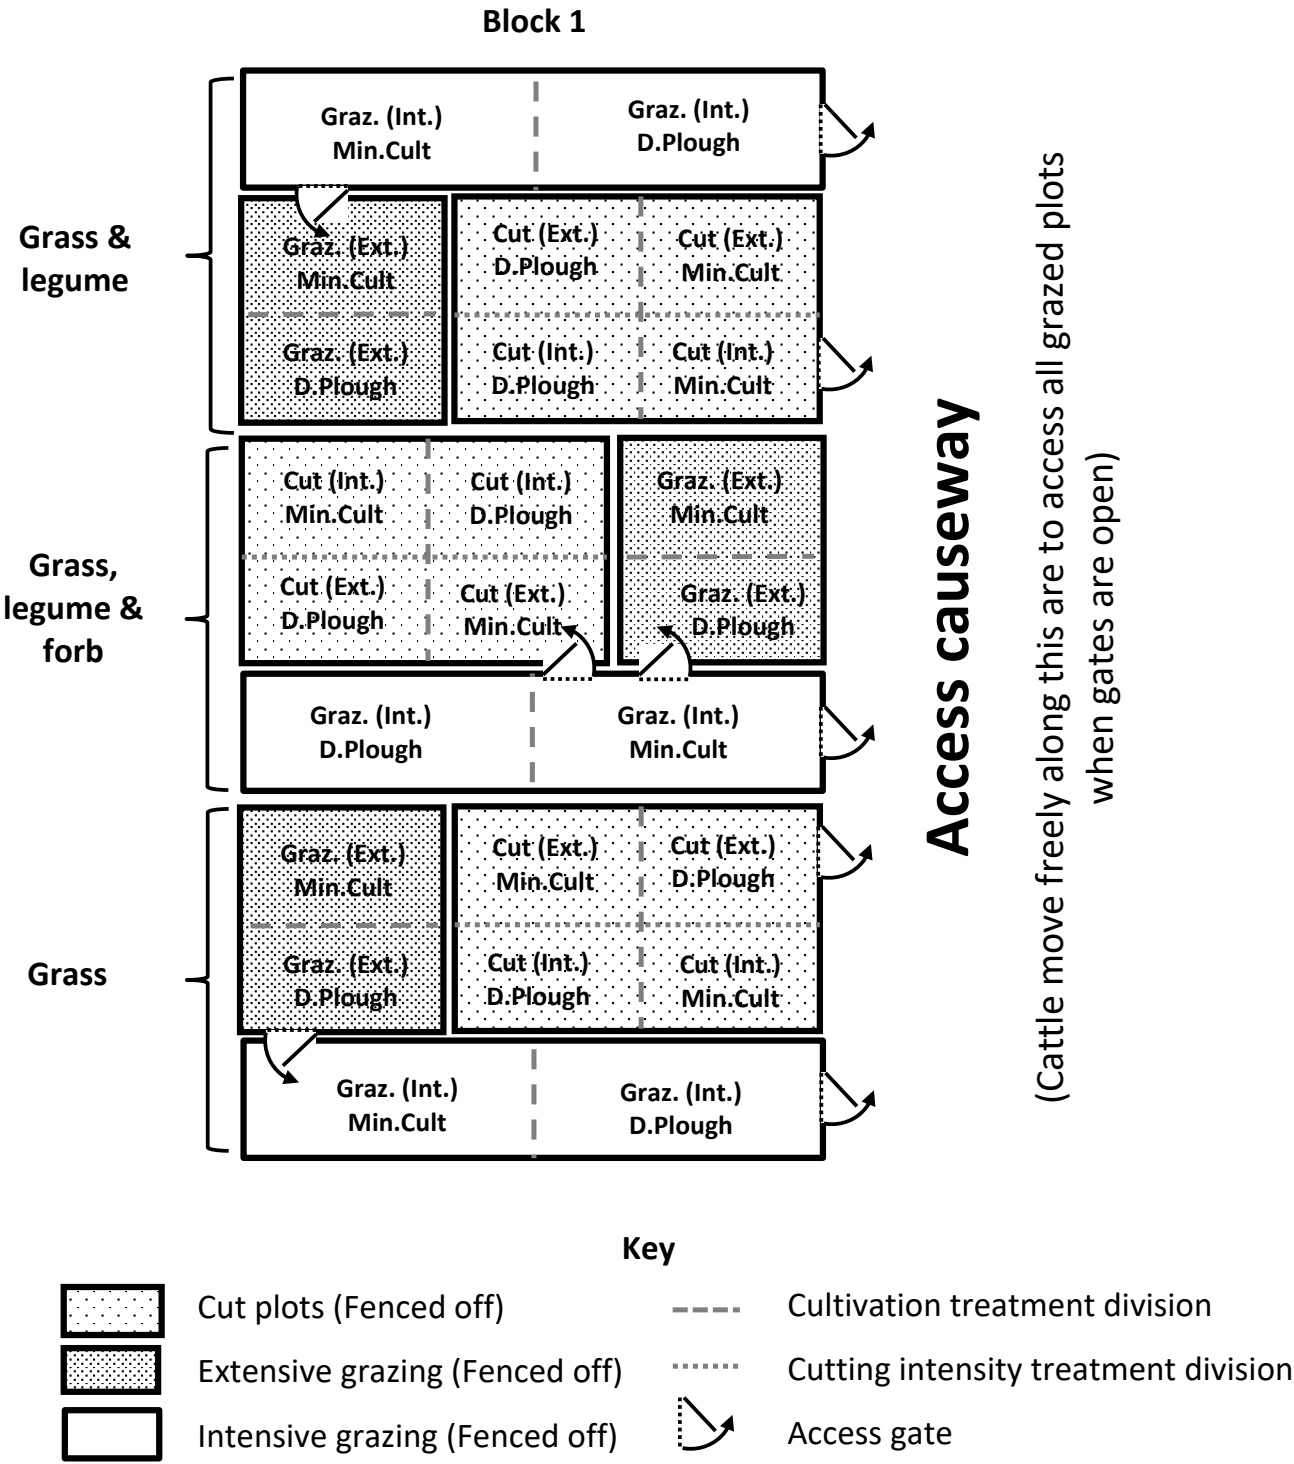

Supplement: s1 [file s1]
