# Supplementary material for: Management to Support Multiple Ecosystem Services from Productive Grasslands
Source: MDPI journal article supplement (doi:10.3390/su13116263), 2021-06-01
Supplement: s1 [file s1]

## Supplementary tables

|                                            | Sowing rates (kg ha <sup>-1</sup> ) used to establishing seed mixtures |                |                       |
|--------------------------------------------|------------------------------------------------------------------------|----------------|-----------------------|
|                                            | Grass only                                                             | Grass & legume | Grass, legume & forbs |
| <b>Sown grasses</b>                        |                                                                        |                |                       |
| <i>Alopecurus pratensis</i> L.             | 5.00                                                                   | 3.75           | 3.00                  |
| <i>Dactylis glomerata</i> L.               | 6.50                                                                   | 4.88           | 3.90                  |
| <i>Festuca pratensis</i> Huds.             | 5.00                                                                   | 3.75           | 3.00                  |
| <i>Lolium perenne</i> L.                   | 13.00                                                                  | 9.75           | 7.80                  |
| <i>Phleum pratense</i> L.                  | 0.50                                                                   | 0.38           | 0.30                  |
| <b>Sown Legumes</b>                        |                                                                        |                |                       |
| <i>Lotus corniculatus</i> L.               |                                                                        | 1.00           | 1.00                  |
| <i>Melilotus officinalis</i> (L.)<br>Pall. |                                                                        | 2.00           | 2.00                  |
| <i>Onobrychis viciifolia</i><br>Scop.      |                                                                        | 4.50           | 4.50                  |
| <i>Trifolium dubium</i> Sibth.             |                                                                        | 1.00           | 1.00                  |
| <i>Trifolium hybridum</i> L.               |                                                                        | 1.00           | 1.00                  |
| <i>Trifolium pratense</i> L.               |                                                                        | 1.60           | 1.60                  |
| <i>Trifolium repens</i> L.                 |                                                                        | 0.40           | 0.40                  |
| <b>Sown Forbs</b>                          |                                                                        |                |                       |
| <i>Achillea millefolium</i> L.             |                                                                        |                | 0.40                  |
| <i>Centaurea nigra</i> L.                  |                                                                        |                | 0.30                  |
| <i>Cichorium intybus</i> L.                |                                                                        |                | 1.00                  |
| <i>Leucanthemum vulgare</i><br>Lam.        |                                                                        |                | 0.20                  |
| <i>Rumex acetosa</i> L.                    |                                                                        |                | 0.10                  |
| <i>Sanguisorba minor</i> Scop.             |                                                                        |                | 2.00                  |

**Table S1.** Species composition of seed treatments

| Ecosystem Service Category                                                                                                                                                                                                                                                      | Specific Ecosystem Service of Interest                                                                           | Ecosystem Service Class and Indicator Measured                                                              |
|---------------------------------------------------------------------------------------------------------------------------------------------------------------------------------------------------------------------------------------------------------------------------------|------------------------------------------------------------------------------------------------------------------|-------------------------------------------------------------------------------------------------------------|
| <b>Regulating Services</b><br>The benefits obtained from the regulation of natural processes, including air quality regulation, climate regulation, water regulation, erosion regulation, water purification, disease and pest control, pollination, natural hazard regulation. | <b>Pollination</b> – Ecosystem changes that affect the distribution, abundance and effectiveness of pollinators. | <ul style="list-style-type: none"> <li>Pollinator abundance (bees, butterflies, and hoverflies).</li> </ul> |

|                                                                                                                                                                                                                                                                                                                                                                                                                          |                                                                                                 |                                                                                                             |
|--------------------------------------------------------------------------------------------------------------------------------------------------------------------------------------------------------------------------------------------------------------------------------------------------------------------------------------------------------------------------------------------------------------------------|-------------------------------------------------------------------------------------------------|-------------------------------------------------------------------------------------------------------------|
|                                                                                                                                                                                                                                                                                                                                                                                                                          | <b>Pest Control</b> – Ecosystem changes that affect the prevalence of crop and livestock pests. | <ul style="list-style-type: none"><li>• Predatory beetle abundance (Carabidae and Staphylinidae).</li></ul> |
| <b>Cultural Services</b><br><br>The non-material benefits people obtain from ecosystems through spiritual enrichment, cognitive development, reflection, recreation and aesthetic enjoyment, including cultural diversity, spiritual and religious values, knowledge systems, educational values, inspiration, aesthetic values, social relations, sense of place, cultural heritage values, recreation, and ecotourism. | <b>Cultural services linked to farmland birds</b>                                               | <ul style="list-style-type: none"><li>• Beetle biomass – food availability for birds.</li></ul>             |

|                                                                                                                                                                                                                                                                                   |                                                                                                                                                                                                                                                                                                                                                                                                 |                                                                                                                                                                                                                                            |
|-----------------------------------------------------------------------------------------------------------------------------------------------------------------------------------------------------------------------------------------------------------------------------------|-------------------------------------------------------------------------------------------------------------------------------------------------------------------------------------------------------------------------------------------------------------------------------------------------------------------------------------------------------------------------------------------------|--------------------------------------------------------------------------------------------------------------------------------------------------------------------------------------------------------------------------------------------|
| <p><b>Supporting services</b><br/>The services that are necessary for the production of all other ecosystem services, including soil formation, photosynthesis, primary production, nutrient cycling, and water cycling.</p>                                                      | <p><b>Nutrient cycling -</b><br/>Approximately 20 nutrients essential for life, including nitrogen and phosphorus, cycle through ecosystems and are maintained at different concentrations in different parts of ecosystems.</p> <p><b>Soil formation/quality-</b> Many provisioning services depend on soil fertility, the rate of soil formation influences human wellbeing in many ways.</p> | <ul style="list-style-type: none"> <li>• Soil compaction: bulk density.</li> <li>• Soil carbon content.</li> <li>• Soil nitrogen content.</li> </ul>                                                                                       |
| <p><b>Provisioning Services</b><br/>Products obtained from ecosystems including fresh water, food, fibre (e.g. timber, cotton), fuel, genetic resources, biochemicals, ornamental resources (e.g. shells, flowers, and animal skins), natural medicines, and pharmaceuticals.</p> | <p><b>Agricultural productivity:</b><br/>Amount and quality of stored livestock forage products.</p>                                                                                                                                                                                                                                                                                            | <ul style="list-style-type: none"> <li>• Dry matter yield of stored livestock forage products that would ultimately produce either silage or hay</li> <li>• Herbage nitrogen content as an indicator of forage product quality.</li> </ul> |

**Table S2.** Categories, Classes, and Indicators of Ecosystem Services Measured. All category

definitions taken from Millennium Ecosystem Assessment Synthesis Report (2005).

Savage *et al.* Supplementary Tables

| Response                                       | R <sup>2</sup> Global | Fixed Effects within ΔAIC<2 models            | Models ΔAIC<2 | Intercept | Model Outputs                             | Sward plant functional diversity (SEED) | Management (M)           | Management Intensity (MI) | Cultivation (C)              | Year (Y)                                         |
|------------------------------------------------|-----------------------|-----------------------------------------------|---------------|-----------|-------------------------------------------|-----------------------------------------|--------------------------|---------------------------|------------------------------|--------------------------------------------------|
| Agronomic Production; Forage Yield and Quality |                       |                                               |               |           |                                           |                                         |                          |                           |                              |                                                  |
| Dry Matter Yield                               | 0.68                  | C + SEED + MI + Y<br>(w <sub>i</sub> = 0.48)  | 3             | 6.94      | Importance Score (summed w <sub>i</sub> ) | 1.00                                    | --                       | 0.77                      | 0.71                         | 1.00                                             |
|                                                |                       |                                               |               |           | Weighted parameter estimates (μ)          | G= 3.33<br>GL= 6.94<br>GLF= 7.83        | --                       | Int.= 7.36<br>Ext.= 6.94  | Deep =6.94<br>Min.till.= 7.3 | Yr1= 6.94<br>Yr2= 3.09<br>Yr3= 6.71<br>Yr4= 2.73 |
| Herbage Nitrogen Content                       | 0.6                   | SEED + Y<br>(w <sub>i</sub> = 0.42)           | 3             | 1.97      | Importance Score (summed w <sub>i</sub> ) | 1.00                                    | --                       | 0.16                      | 0.42                         | 1.00                                             |
|                                                |                       |                                               |               |           | Weighted parameter estimates (μ)          | G= 1.64<br>GL= 1.97<br>GLF= 1.98        | --                       | Int.= 1.97<br>Ext.= 1.97  | Deep= 1.97<br>Min.till.= 2.0 | Yr1= 1.97<br>Yr2= 1.98<br>Yr3= 1.44<br>Yr4= 1.10 |
| Pollination & Pest Control                     |                       |                                               |               |           |                                           |                                         |                          |                           |                              |                                                  |
| Pollinator Species Richness                    | 0.69                  | SEED + M +MI + Y<br>(w <sub>i</sub> = 0.45)   | 4             | 1.95      | Importance Score (summed w <sub>i</sub> ) | 1.00                                    | 0.66                     | 1.00                      | 0.31                         | 1.00                                             |
|                                                |                       |                                               |               |           | Weighted parameter estimates (μ)          | G= 1.49<br>GL= 7.03<br>GLF= 8.08        | Cut= 7.03<br>Graze= 6.36 | Int.= 0.87<br>Ext.= 6.11  | Deep= 7.03<br>Min.till.= 7.0 | Yr1= 7.03<br>Yr2= 4.26<br>Yr3= 6.11<br>Yr4= 4.90 |
| Pollinator Abundance                           | 0.90                  | SEED + M + MI + C + Y (w <sub>i</sub> = 0.79) | 2             | 3.92      | Importance Score (summed w <sub>i</sub> ) | 1.00                                    | 1.00                     | 1.00                      | 0.79                         | 1.00                                             |

Savage *et al.* Supplementary Tables[illegible]

Savage *et al.* Supplementary Tables

|                      |      |                              |    |      |                                                                |                                  |                          |    |                                |                                                |
|----------------------|------|------------------------------|----|------|----------------------------------------------------------------|----------------------------------|--------------------------|----|--------------------------------|------------------------------------------------|
| <b>Bulk Density</b>  | 0.04 | Null<br>( $w_i = 0.32$ )     | 11 | 0.93 | <b>Importance<br/>Score<br/>(summed <math>w_i</math>)</b>      | 0.24                             | 0.23                     | -- | 0.24                           | 0.20                                           |
|                      |      |                              |    |      | <b>Weighted<br/>parameter<br/>estimates (<math>\mu</math>)</b> | G= 0.95<br>GL= 0.93<br>GLF= 0.93 | Cut= 0.93<br>Graze= 0.93 | -- | Deep= 0.93<br>Min.till.= 0.925 | Yr1= 0.93<br>Yr2= 0.93<br>Yr3= --<br>Yr4= 0.94 |
| <b>Soil Carbon</b>   | 0.15 | C<br>( $w_i = 0.37$ )        | 6  | 2.7  | <b>Importance<br/>Score<br/>(summed <math>w_i</math>)</b>      | 0.24                             | 0.19                     | -- | 1.00                           | 0.34                                           |
|                      |      |                              |    |      | <b>Weighted<br/>parameter<br/>estimates (<math>\mu</math>)</b> | G= 2.65<br>GL= 2.7<br>GLF= 2.68  | Cut= 2.7<br>Graze= 2.7   | -- | Deep= 2.7<br>Min.till.= 2.88   | Yr1= 2.7<br>Yr2= 2.66<br>Yr3= --<br>Yr4= 2.68  |
| <b>Soil Nitrogen</b> | 0.2  | SEED + C<br>( $w_i = 0.32$ ) | 6  | 0.26 | <b>Importance<br/>Score<br/>(summed <math>w_i</math>)</b>      | 0.69                             | 0.17                     | -- | 1.00                           | 0.39                                           |

Savage *et al.* Supplementary Tables

|                                                                  |      |                                             |   |        |                                              |                                       |                              |                              |                                  |                                                       |
|------------------------------------------------------------------|------|---------------------------------------------|---|--------|----------------------------------------------|---------------------------------------|------------------------------|------------------------------|----------------------------------|-------------------------------------------------------|
|                                                                  |      |                                             |   |        | Weighted<br>parameter<br>estimates ( $\mu$ ) | G= 0.25<br>GL= 0.26<br>GLF= 0.26      | Cut= 0.26<br>Graze= 0.26     | --                           | Deep= 0.26<br>Min.till.= 0.27    | Yr1= 0.26<br>Yr2= 0.26<br>Yr3= --<br>Yr4= 0.26        |
| Cultural Services (Food Resources for Farmland Birds (BIRDFOOD)) |      |                                             |   |        |                                              |                                       |                              |                              |                                  |                                                       |
| Total<br>Invertebrate<br>Biomass                                 | 0.51 | SEED + M + MI<br>+ C + Y<br>( $w_i$ = 0.99) | 1 | 133.47 | Importance<br>Score<br>(summed $w_i$ )       | 1.00                                  | 1.00                         | 1.00                         | 0.9                              | 1.00                                                  |
|                                                                  |      |                                             |   |        | Weighted<br>parameter<br>estimates ( $\mu$ ) | G= 67.77<br>GL= 133.47<br>GLF= 144.28 | Cut= 133.47<br>Graze= 112.18 | Int.= 107.28<br>Ext.= 133.47 | Deep= 133.47<br>Min.till.= 149.7 | Yr1= 133.47<br>Yr2= 88.69<br>Yr3= 96.97<br>Yr4= 65.46 |

**Table S3.** Summary of model outputs.  $R^2_{Global}$  = marginal  $R^2$  value for the global model which provides an indication of the variance explained by the fixed effects;  $w_i$  = Variable importance score for the best fit model;  $\Delta AIC < 2$  = Sub-set of models with 2 AIC points of the best fit model. Following Burnham & Anderson (1998) this represents that sub-set of models that do not differ in their explanatory power; For “Pollination & Pest Control”, and “Cultural Services”, each response variable is tested against all 32 possible combinations of the fixed effects including a saturated and null model. For “Soil Processes” and “Agronomic Production”, each response variable is tested against all 16 possible combinations of the fixed effects including a saturated and null model. Importance Score = represents a relative measure of the importance of an individual fixed effect within the  $\Delta AIC < 2$  subset of models. It is calculated as the sum of the  $w_i$  scores for models within the  $\Delta AIC < 2$  subset that contain an explanatory factor over the sum of  $w_i$  scores from all models within that  $\Delta AIC < 2$  subset. Explanatory factors with an importance score of less than 0.5 are considered to be of marginal importance. ;  $\mu$  = Weighted mean parameter estimate derived using the  $w_i$  importance score. The established sward plant functional diversity differs from grassland only (G), grass and legumes (GL) and grasses, legumes and other non-legume flowering forbs (GLF); Ext. = extensive management practices that incorporate a rest period to allow plant growth in the summer; Int. = Intensive management practices with no rest period; Min. till. = minimum tillage cultivation; Deep = conventional deep ploughing cultivation; -- = response variable not measured.
